# Supplementary material for: Central Asian Modulation of Northern Hemisphere Moisture Transfer Over the Late Cenozoic
Source: Research Square preprint supplement (doi:10.21203/rs.3.rs-117347/v1), 2020-12-11
Supplement: Supplementary file 1 [file 7f76e1109e81e61a802ac61f.xlsx]

## Sheet: Sheet1
	ID	Easotope Name	d47 WG (PBL)	d47 WG (PBL) SD	∆47 WG (PBL)	∆47 WG (PBL) SD	Enabled Acquisitions
R1	2019-04-05 17:59 CEST	HG	-26.016	0.021	-0.855	0.02	13		ETF
R4	2019-04-08 21:02 CEST	HG	-1.675	0.026	-0.866	0.026	13			47
R5	2019-04-09 17:47 CEST	HG	17.024	0.023	-0.849	0.021	13		Brand	HG	25G
R8	2019-04-10 18:50 CEST	HG	-25.064	0.019	-0.87	0.022	13		Intercept	-0.866663	0.0161921
R9	2019-04-12 13:37 CEST	HG	-2.429	0.022	-0.858	0.024	13		Intended	0.0266	0.9252
R11	2019-04-15 17:48 CEST	HG	18.786	0.018	-0.849	0.016	13
R12	2019-04-16 18:58 CEST	HG	-26.806	0.027	-0.861	0.027	13		SLOPE	1.01783
R13	2019-04-17 19:48 CEST	HG	-1.368	0.026	-0.866	0.028	13		INTERCEPT	0.908719
R15	2019-04-23 18:32 CEST	HG	18.481	0.017	-0.856	0.019	13
R17	2019-04-24 19:39 CEST	HG	-25.76	0.022	-0.85	0.024	13
R18	2019-04-25 16:25 CEST	HG	-1.973	0.013	-0.863	0.011	13
R19	2019-04-26 19:32 CEST	HG	17.054	0.027	-0.868	0.029	13
R20	2019-04-29 19:15 CEST	HG	-21.661	0.021	-0.881	0.022	13
R23	2019-04-30 20:33 CEST	HG	-1.206	0.029	-0.866	0.029	13
R25	2019-05-02 19:23 CEST	HG	18.782	0.025	-0.856	0.025	13
R26	2019-05-03 18:06 CEST	HG	-21.599	0.027	-0.844	0.027	13
R27	2019-05-06 19:51 CEST	HG	-1.412	0.02	-0.861	0.019	13
R29	2019-05-08 19:57 CEST	HG	18.968	0.018	-0.856	0.019	13
R30	2019-05-10 15:49 CEST	HG	-21.707	0.023	-0.879	0.022	13
R32	2019-05-14 15:25 CEST	HG	-2.02	0.024	-0.874	0.025	13
R33	2019-05-15 20:10 CEST	HG	17.258	0.027	-0.885	0.028	13
R34	2019-05-16 19:16 CEST	HG	-25.435	0.031	-0.876	0.03	13
R36	2019-05-20 19:53 CEST	HG	-1.374	0.028	-0.87	0.025	13
R38	2019-05-22 22:07 CEST	HG	18.47	0.028	-0.881	0.028	13
R40	2019-05-28 22:28 CEST	HG	-16.053	0.026	-0.855	0.027	12
R42	2019-05-29 15:55 CEST	HG	-2.15	0.03	-0.864	0.03	13
R43	2019-05-31 18:45 CEST	HG	18.733	0.025	-0.882	0.024	13
R45	2019-06-03 18:05 CEST	HG	-15.912	0.022	-0.869	0.023	13
R47	2019-06-05 18:44 CEST	HG	-2.249	0.024	-0.864	0.023	13
R49	2019-06-07 20:44 CEST	HG	17.597	0.025	-0.875	0.025	13
R51	2019-06-12 19:54 CEST	HG	-18.332	0.032	-0.851	0.033	13
R52	2019-06-14 18:29 CEST	HG	-1.431	0.025	-0.873	0.026	13
R54	2019-06-17 18:34 CEST	HG	-25.132	0.034	-0.879	0.033	13
R56	2019-06-19 21:37 CEST	HG	17.142	0.025	-0.879	0.026	13
R57	2019-06-21 18:42 CEST	HG	-1.45	0.021	-0.874	0.019	13
R59	2019-06-24 17:51 CEST	HG	-18.005	0.026	-0.865	0.025	13
R61	2019-06-26 17:56 CEST	HG	16.482	0.026	-0.866	0.025	13
R63	2019-06-28 19:15 CEST	HG	-1.946	0.025	-0.849	0.026	13
R65	2019-07-02 18:46 CEST	HG	-21.982	0.019	-0.872	0.019	13
R66	2019-07-03 20:10 CEST	HG	16.883	0.016	-0.865	0.014	13
R68	2019-07-05 14:36 CEST	HG	-2.1	0.027	-0.877	0.028	13
R69	2019-07-08 18:49 CEST	HG	-21.554	0.026	-0.874	0.024	13
R70	2019-07-08 22:59 CEST	HG	-21.762	0.017	-0.876	0.017	13
R72	2019-07-10 18:46 CEST	HG	18.213	0.028	-0.869	0.03	13
R74	2019-07-12 14:21 CEST	HG	-1.963	0.025	-0.87	0.026	13
R75	2019-07-15 18:31 CEST	HG	-21.593	0.022	-0.88	0.022	13
R77	2019-07-18 18:44 CEST	HG	18.547	0.017	-0.862	0.019	13
R79	2019-07-19 16:03 CEST	HG	-2.183	0.022	-0.874	0.023	13
R80	2019-07-22 19:47 CEST	HG	-21.575	0.019	-0.872	0.021	13
R81	2019-07-23 21:04 CEST	HG	18.24	0.021	-0.848	0.023	13
R83	2019-07-25 20:03 CEST	HG	-1.182	0.021	-0.869	0.022	13
R85	2019-07-29 20:54 CEST	HG	-21.783	0.025	-0.867	0.027	13
R87	2019-07-31 19:46 CEST	HG	18.705	0.032	-0.874	0.031	13
R88	2019-08-01 16:55 CEST	HG	-2.19	0.028	-0.871	0.027	13
	ID	Easotope Name	d47 WG (PBL)	d47 WG (PBL) SD	∆47 WG (PBL)	∆47 WG (PBL) SD	Enabled Acquisitions
R2	2019-04-05 22:07 CEST	25G	-28.565	0.03	0.025	0.03	13
R3	2019-04-08 16:53 CEST	25G	-27.239	0.029	0.027	0.03	13
R6	2019-04-09 21:56 CEST	25G	-27.588	0.025	0.016	0.026	13
R7	2019-04-10 14:41 CEST	25G	-2.976	0.021	0.017	0.022	13
R10	2019-04-12 17:48 CEST	25G	33.518	0.023	0.03	0.022	13
R14	2019-04-18 20:47 CEST	25G	-27.11	0.015	0.005	0.016	13
R16	2019-04-23 22:41 CEST	25G	-3.583	0.033	0.032	0.032	13
R21	2019-04-29 23:25 CEST	25G	32.275	0.026	0.023	0.025	13
R22	2019-04-30 03:39 CEST	25G	32.669	0.02	0.019	0.02	13
R24	2019-05-02 15:08 CEST	25G	-28.076	0.026	0.022	0.03	13
R28	2019-05-07 17:11 CEST	25G	-3.437	0.027	0.024	0.025	13
R31	2019-05-13 18:41 CEST	25G	-28.559	0.019	0.006	0.021	13
R35	2019-05-17 20:26 CEST	25G	-2.931	0.02	0.003	0.02	13
R37	2019-05-21 21:12 CEST	25G	33.344	0.018	0.018	0.019	13
R39	2019-05-23 20:26 CEST	25G	-28.342	0.017	0.001	0.02	13
R41	2019-05-29 02:51 CEST	25G	-3.304	0.022	0.021	0.021	12
R44	2019-05-31 22:54 CEST	25G	32.686	0.03	0.012	0.029	13
R46	2019-06-04 17:15 CEST	25G	-28.195	0.023	0.01	0.023	13
R48	2019-06-06 15:31 CEST	25G	33.241	0.027	0.009	0.025	13
R50	2019-06-11 16:49 CEST	25G	-3.461	0.024	0.013	0.023	13
R53	2019-06-14 22:39 CEST	25G	-27.498	0.026	-0.004	0.027	13
R55	2019-06-18 19:51 CEST	25G	33.452	0.021	0.012	0.021	13
R58	2019-06-21 22:53 CEST	25G	-3.368	0.029	0.004	0.027	13
R60	2019-06-25 20:23 CEST	25G	-27.92	0.027	0.022	0.028	13
R62	2019-06-27 19:11 CEST	25G	34.22	0.026	0.011	0.026	13
R64	2019-07-01 17:10 CEST	25G	-27.758	0.02	0.028	0.023	13
R67	2019-07-04 17:19 CEST	25G	-3.148	0.019	0.01	0.02	13
R71	2019-07-09 21:29 CEST	25G	33.618	0.027	0.03	0.027	13
R73	2019-07-11 17:17 CEST	25G	-27.686	0.025	-0.002	0.024	13
R76	2019-07-16 20:01 CEST	25G	-3.311	0.033	0.029	0.033	13
R78	2019-07-18 22:53 CEST	25G	34.069	0.025	0.022	0.022	13
R82	2019-07-24 18:16 CEST	25G	-27.74	0.022	0.02	0.022	13
R84	2019-07-26 17:20 CEST	25G	-3.339	0.033	0.02	0.033	13
R86	2019-07-30 18:20 CEST	25G	34.016	0.036	0.008	0.032	13
R89	2019-08-02 18:10 CEST	25G	-27.953	0.019	0.012	0.022	13
	2019-08-05 18:56 CEST	25G	-3.722	0.01	0.024	0.01	13
