# Supplementary material for: Central Asian Modulation of Northern Hemisphere Moisture Transfer Over the Late Cenozoic
Source: Research Square preprint supplement (doi:10.21203/rs.3.rs-117347/v1), 2020-12-11
Supplement: Supplementary file 2 [file 89a4464cb34cf57d88440daa.xlsx]

## Sheet: Sheet1
Sample ID	Sequence ID	Environnement	Depth (m)	d13C (VPDB)	Std	d18O (VPDB)	Std
CHA18-US2-C01425	US2	aeolian	33.026	-4.49818	0.436629	-8.06644	0.0467023
CHA18-US2-C02175	US2	aeolian	32.276	-4.39001	1.40178	-8.72931	0.387552
CHA18-US2-C02275	US2	aeolian	32.176	-5.4344	0.024528	-9.32253	0.284399
CHA18-US2-C02775	US2	aeolian	31.676	-3.96479	0.464267	-8.94405	0.103395
CHA18-US2-C02875	US2	aeolian	31.576	-4.72545	0.443529	-9.328	0.572931
CHA18-US2-C03075	US2	aeolian	31.376	-4.10832	0.171566	-8.92775	0.0442954
CHA18-US2-C03225	US2	aeolian	31.226	-5.75357	0.427775	-9.97813	0.91553
CHA18-US2-C03375	US2	aeolian	31.126	-4.63946	0.360187	-9.75718	0.136806
CHA18-US2-C03625	US2	aeolian	30.826	-4.86207	0.236522	-9.62716	0.579607
CHA18-US2-C03825	US2	aeolian	30.626	-3.4476	0.321067	-9.2325	0.171011
CHA18-US2-C03975	US2	aeolian	30.476	-3.6164	1.11439	-8.72835	0.201621
CHA18-US2-C04175	US2	aeolian	30.276	-4.75665	0.403836	-8.66795	0.213315
CHA18-US2-C04325	US2	aeolian	30.126	-2.46357	0.518194	-8.68571	0.27345
CHA18-US2-C04625	US2	aeolian	29.826	-3.4648	0.744725	-8.02149	0.277847
CHA18-US2-C04725	US2	aeolian	29.726	-3.62977	0.626256	-8.72153	0.443596
CHA18-US2-C04900	US2	aeolian	29.526	-2.72678	0.162831	-8.23407	0.0693778
CHA18-US2-C05125	US2	aeolian	29.326	-2.86621	0.844574	-8.77259	0.624831
CHA18-US2-C05300	US2	aeolian	29.126	-3.28483	0.661366	-8.84123	0.349528
CHA18-US2-C05675	US2	aeolian	28.776	-3.42977	0.139988	-8.38299	0.337907
CHA18-US2-C05800	US2	aeolian	28.626	-5.0221	0.470035	-9.4077	1.26246
CHA18-US2-C06125	US2	aeolian	28.326	-5.64656	0.795676	-8.03906	0.303452
CHA18-US2-C06275	US2	aeolian	28.176	-5.13778	0.376691	-8.79954	0.144575
CHA18-US2-C06450	US2	aeolian	27.976	-3.63863	0.441894	-8.37497	0.0251953
CHA18-US2-C07175	US2	aeolian	27.276	-3.90283	1.32804	-8.60674	0.082794
CHA18-US2-C07475	US2	aeolian	27.026	-4.13642	1.18644	-9.63029	0.250883
CHA18-US2-C07625	US2	aeolian	26.826	-4.24462	0.351352	-8.37579	0.306326
CHA18-US2-C07775	US2	aeolian	26.676	-5.76168	0.237345	-10.1383	0.770048
CHA18-US2-C07925	US2	aeolian	26.526	-5.55476	0.337298	-9.04342	0.19418
CHA18-US2-C08025	US2	aeolian	26.426	-6.70626	0.782926	-9.20712	0.557737
CHA18-US1c4-C00720	US1c	aeolian	25.992	-4.45775	0.917095	-8.50469	0.343156
CHA18-US1c4-C01518	US1c	aeolian	25.232	-5.69208	0.186586	-9.26847	0.285762
CHA18-US1c4-C01710	US1c	aeolian	25.042	-5.94983	0.113847	-9.15489	0.142056
CHA18-US1c4-C01800	US1c	aeolian	24.947	-5.94014	0.166474	-9.45665	0.289388
CHA18-US1c4-C02100	US1c	aeolian	24.662	-6.24574	0.0826685	-9.45796	0.153753
CHA18-US1c4-C02340	US1c	aeolian	24.4245	-6.21958	0.687647	-9.72484	0.636591
CHA18-US1c4-C02470	US1c	aeolian	24.3295	-6.52215	0.17374	-9.06278	0.302249
CHA18-US1c4-C02680	US1c	aeolian	24.1395	-6.96045	0.197419	-9.22113	0.133255
CHA18-US1c4-C02855	US1c	aeolian	23.9495	-7.23631	0.232874	-11.5656	0.106766
CHA18-US1c4-C03030	US1c	aeolian	23.7595	-6.90533	0.098198	-9.18685	0.223091
CHA18-US1c4-C03170	US1c	aeolian	23.6645	-7.08466	0.144716	-9.46687	0.393059
CHA18-US1c4-C03380	US1c	aeolian	23.4745	-7.21588	0.501193	-10.9952	0.704688
CHA18-US1c4-C03660	US1c	aeolian	23.1895	-6.44137	0.113216	-10.166	0.684654
CHA18-US1c4-C03940	US1c	aeolian	22.9045	-6.83568	0.0407034	-9.13469	0.101512
CHA18-US1c3-C00455	US1c	aeolian	22.4775	-1.95051	0.137702	-9.7495	0.423033
CHA18-US1c3-C00560	US1c	aeolian	22.3825	-6.25977	0.478322	-10.5601	0.280358
CHA18-US1c4-C04780	US1c	aeolian	22.192	-6.97013	0.349124	-10.3382	0.284101
CHA18-US1c3-C01015	US1c	aeolian	21.9075	-4.35768	0.328324	-9.78241	0.576007
CHA18-US1c3-C01610	US1c	aeolian	21.385	-5.19682	0.29964	-9.35823	0.664316
CHA18-US1c3-C02205	US1c	aeolian	20.815	-5.03843	0.738715	-9.43873	0.23449
CHA18-US1c3-C02485	US1c	aeolian	20.5775	-6.13299	0.345983	-9.71255	0.403202
CHA18-US1c3-C02730	US1c	aeolian	20.2925	-3.57016	0.0050391	-10.7976	0.0864494
CHA18-US1c3-C03080	US1c	aeolian	20.0075	-4.90626	0.530117	-8.91536	0.413457
CHA18-US1c3-C03255	US1c	aeolian	19.8175	-5.502	0.306706	-8.57463	0.487172
CHA18-US1c3-C03570	US1c	aeolian	19.5325	-4.72943	0.443863	-9.34804	0.250075
CHA18-US1c3-C03780	US1c	aeolian	19.3425	-4.99232	0.51761	-8.82982	0.30525
CHA18-US1c3-C04270	US1c	aeolian	18.8675	-4.77953	0.108272	-9.05967	0.149293
CHA18-US1c3-C04375	US1c	aeolian	18.7725	-5.49474	0.0904613	-8.95839	0.655949
CHA18-US1c3-C04655	US1c	aeolian	18.4875	-4.90936	0.395887	-10.4184	0.849133
CHA18-US1c3-C04900	US1c	aeolian	18.25	-4.55963	0.382029	-10.9082	0.396422
CHA18-US1c3-C05740	US1c	aeolian	17.4425	-6.16159	0.127099	-11.955	0.0777839
CHA18-US1c3-C05940	US1c	aeolian	17.2525	-4.86693	0.541776	-9.51891	0.464648
CHA18-US1c3-C06390	US1c	aeolian	16.825	-5.33668	0.0451373	-9.76188	0.721502
CHA18-US1c3-C06840	US1c	aeolian	16.3975	-5.59949	0.597082	-9.54686	0.299889
CHA18-US1c3-C08390	US1c	aeolian	14.925	-3.81003	0.475468	-8.75427	0.260234
CHA18-US1c3-C08740	US1c	aeolian	14.5925	-3.23359	0.0828778	-9.19766	0.862987
CHA18-US1c3-C09240	US1c	aeolian	14.1175	-4.37297	0.327908	-9.11089	0.0815513
CHA18-US1c2-C02000	US1c	aeolian	14.07	-4.73985	0.621826	-9.69994	1.29593
CHA18-US1c2-C01900	US1c	aeolian	13.07	-4.25211	0.686647	-9.24039	0.192717
CHA18-US1c2-C01700	US1c	aeolian	12.87	-3.96573	0.612593	-9.06611	0.358596
CHA18-US1c2-C01600	US1c	aeolian	12.77	-4.00475	0.685214	-9.14839	0.525737
CHA18-US1c2-C01500	US1c	aeolian	12.67	-3.56819	1.42559	-9.32249	0.58845
CHA18-US1c2-C01300	US1c	aeolian	12.47	-4.30451	0.336175	-9.3531	0.0468303
CHA18-US1c2-C01000	US1c	aeolian	12.17	-4.76787	0.0856769	-9.34524	0.315994
CHA18-US1c2-C00850	US1c	aeolian	12.02	-4.93392	0.216983	-8.916	0.374326
CHA18-US1c2-C00600	US1c	aeolian	11.77	-4.91369	0.645823	-8.89084	0.661773
CHA18-US1c2-C00450	US1c	aeolian	11.62	-3.72207	0.145995	-8.98391	0.184428
CHA18-US1c1-C01600	US1c	aeolian	11.17	-4.57465	0.150464	-8.48928	0.0882451
CHA18-US1c1-C01300	US1c	aeolian	10.97	-4.73469	0.158198	-9.23306	0.54748
CHA18-US1c1-C01000	US1c	aeolian	10.67	-5.35145	0.344427	-10.3033	0.115007
CHA18-US1c1-C00500	US1c	aeolian	10.17	-5.73067	0.209146	-8.9059	0.35749
CHA18-US1b-C03500	US1a-b	aeolian	9.9068	-5.03503	0.18035	-9.33869	0.221236
CHA18-US1c1-C00100	US1a-b	aeolian	9.77	-4.82186	0.544416	-8.83007	0.871756
CHA18-US1b-C03100	US1a-b	aeolian	9.58968	-1.00182	0.179849	-6.06004	0.159382
CHA18-US1b-C02900	US1a-b	aeolian	9.43112	-4.8059	0.286089	-8.67398	0.451971
CHA18-US1b-C02800	US1a-b	aeolian	9.35184	-4.705	0.695562	-8.12528	0.270429
CHA18-US1b-C02500	US1a-b	aeolian	9.114	-4.29923	0.279538	-8.49211	0.348753
CHA18-US1b-C02300	US1a-b	aeolian	8.95544	-4.22315	0.851483	-8.63979	0.203931
CHA18-US1b-C02000	US1a-b	aeolian	8.7176	-6.52024	0.179639	-8.51333	0.0673035
CHA18-US1b-C01800	US1a-b	aeolian	8.55904	-4.48388	0.311564	-8.74726	0.142083
CHA18-US1b-C01500	US1a-b	aeolian	8.3212	-4.76894	0.690205	-8.50029	0.228988
CHA18-US1b-C01200	US1a-b	aeolian	8.08336	-4.42936	0.201372	-8.42408	0.0482012
CHA18-US1b-C00800	US1a-b	aeolian	7.76624	-5.69849	0.223618	-8.52123	0.0326911
CHA18-US1b-C00600	US1a-b	aeolian	7.60768	-4.35339	0.829639	-8.40542	0.162515
CHA18-US1b-C00400	US1a-b	aeolian	7.44912	-5.17952	0.431787	-8.59171	0.0939438
CHA18-US1a-C03300	US1a-b	aeolian	7.27	-5.65482	0.291453	-8.85051	0.223256
CHA18-US1b-C00100	US1a-b	aeolian	7.21128	-4.84515	0.89573	-8.8304	0.22708
CHA18-US1b-C00000	US1a-b	aeolian	7.132	-5.46625	0.828276	-9.35312	0.977479
CHA18-US1a-C02200	US1a-b	aeolian	6.17	-5.87939	0.473503	-8.67397	0.450635
CHA18-US1a-C01900	US1a-b	aeolian	5.87	-6.07238	0.348064	-9.10669	0.330219
CHA18-US1a-C01600	US1a-b	aeolian	5.57	-4.14331	0.626603	-9.06697	0.0948929
CHA18-US1a-C01400	US1a-b	aeolian	5.37	-5.68843	0.392567	-9.49813	0.426967
CHA18-US1a-C01100	US1a-b	aeolian	5.07	-4.78991	0.838912	-9.85493	0.0459381
CHA18-US1a-C00900	US1a-b	aeolian	4.87	-2.48452	0.293278	-8.72535	0.413526
CHA18-US1a-C00700	US1a-b	aeolian	4.67	-2.85501	0.387489	-10.6144	1.12292
CHA18-US1a-C00300	US1a-b	aeolian	4.27	-4.50188	0.153763	-9.49903	0.584261
CHA18-US1a-C00100	S4	aeolian	4.07	-3.43362	0.413115	-8.88018	0.147855
CHA18-S4-C00480	S4	aeolian	2.71429	-6.3649	0.394882	-8.01798	0.239983
CHA18-S4-C00720	S4	aeolian	2.30114	-6.078	0.5195	-8.26951	0.197906
CHA18-S4-C01100	S4	aeolian	1.81914	-5.62201	0.563304	-9.32048	0.549735
CHA18-S4-C01800	S4	aeolian	0.855143	-4.77101	0.258202	-9.38442	0.139159
CHA18-S4-C02600	S4	aeolian	-0.246571	-5.87227	0.446341	-9.94319	0.159664
CHA17-C00750	MS	aeolian	-0.53	-3.76557	0.472666	-8.81742	0.663059
CHA17-C00800 (C1)	MS	aeolian	-0.576	-6.20061	0.26934	-8.95497	0.242441
CHA17-C01100 (C1)	MS	aeolian	-0.746289	-5.45555	1.10977	-9.34251	0.386177
CHA17-C03000	MS	aeolian	-1.86133	-5.66268	1.02465	-8.84675	0.349491
CHA17-C03100	MS	aeolian	-1.91529	-4.57589	0.714156	-9.75099	0.374781
CHA18-C03000	MS	aeolian	-2.10452	-5.11776	0.206477	-9.2358	0.603765
CHA17-C04500	MS	aeolian	-2.81539	-6.17273	0.188019	-8.41986	0.146471
CHA17-C05700	MS	aeolian	-3.7858	-1.34179	0.22674	-9.19474	0.304915
CHA17-C07300	MS	aeolian	-4.86897	-4.10581	0.177737	-8.89932	0.245278
CHA17-C07900	MS	aeolian	-5.35092	-4.43013	0.211348	-8.72588	0.270699
CHA17-C08300	MS	aeolian	-5.66603	-4.00761	0.133341	-8.70163	0.334639
CHA17-C08600	MS	aeolian	-5.93871	-4.14086	0.300691	-8.81301	0.133973
CHA17-C09000	MS	aeolian	-6.25684	-4.56288	0.255712	-9.16839	0.233124
CHA17-C11300	MS	aeolian	-8.06716	-5.39461	0.321253	-8.70221	0.079491
CHA17-C11700	MS	aeolian	-8.3649	-5.23082	0.224713	-8.73481	0.451182
CHA17-C12000	MS	aeolian	-8.607	-5.52385	0.44692	-8.77429	0.434474
CHA17-C12600	MS	aeolian	-9.11145	-4.88174	0.265456	-8.49334	0.269108
CHA17-C13300	MS	aeolian	-9.67654	-5.28763	0.365244	-8.48801	0.334074
CHA18-C11900	MS	alluvial / aeolian	-9.74819	-5.14507	0.558919	-8.65377	0.1764
CHA18-C12400	MS	alluvial / aeolian	-10.0229	-5.01686	0.10789	-8.17735	0.220227
CHA17-C14100	MS	alluvial / aeolian	-10.1053	-4.28756	0.526713	-8.60361	0.312857
CHA18-C12600	MS	alluvial / aeolian	-10.1327	-4.9968	0.638528	-8.43631	0.19373
CHA18-C12800	MS	alluvial / aeolian	-10.2426	-4.1285	0.604728	-8.74511	0.142041
CHA17-C14400	MS	alluvial / aeolian	-10.4423	-4.41758	0.318014	-8.38137	0.381089
CHA18-C13100	MS	alluvial / aeolian	-10.6132	-3.73624	0.451235	-8.85297	0.506258
CHA17-C14700	MS	alluvial / aeolian	-10.6987	-5.38006	0.388447	-8.89798	0.298676
CHA18-C13300	MS	alluvial / aeolian	-10.7841	-4.32242	0.22716	-8.94059	0.0409386
CHA17-C15400	MS	alluvial / aeolian	-11.3357	-5.40417	0.171792	-9.46766	0.413537
CHA18-C14000	MS	alluvial / aeolian	-11.378	-6.39541	0.0936628	-7.48657	0.165716
CHA18-C14300	MS	alluvial / aeolian	-11.6316	-4.66651	0.0106818	-8.70496	0.11583
CHA18-C14400	MS	alluvial / aeolian	-11.7162	-7.53636	0.0344212	-7.3509	0.00885745
CHA17-C15900	MS	alluvial / aeolian	-11.8007	-5.35562	0.307969	-9.63373	0.348687
CHA17-C16100	MS	alluvial / aeolian	-12.0121	-5.68143	0.529923	-9.09579	0.291116
CHA17-C16800	MS	alluvial / aeolian	-12.6646	-5.61651	0.184665	-9.5266	0.338692
CHA17-C17200	MS	alluvial / aeolian	-13.0545	-5.92912	0.20386	-9.67522	0.317406
CHA17-C17400	MS	alluvial / aeolian	-13.2388	-6.31582	0.374641	-9.7285	0.372816
CHA17-C17800	MS	alluvial / aeolian	-13.6402	-5.46069	0.381721	-8.91429	0.0313626
CHA17-C18200	MS	alluvial / aeolian	-13.8632	-5.3649	0.237665	-8.85988	0.196316
CHA17-C18600	MS	alluvial / aeolian	-14.4286	-6.1962	0.230509	-8.38363	0.379367
CHA17-C18900	MS	alluvial / aeolian	-14.6899	-5.57636	0.395292	-8.59916	0.333306
CHA18-C20800	MS	alluvial / aeolian	-17.323	-4.44368	0.396535	-9.47043	0.335889
CHA18-C21100	MS	alluvial / aeolian	-17.5827	-4.8092	0.434369	-9.41793	0.491495
CHA18-C21300	MS	alluvial / aeolian	-17.7558	-4.50403	0.255138	-8.45468	0.451928
CHA18-C22450	MS	alluvial / aeolian	-18.784	-4.00053	0.131761	-8.66448	0.106059
CHA18-C23000	MS	alluvial / aeolian	-19.2314	-5.65241	0.096119	-8.91302	0.0507027
CHA17-C23800	MS	alluvial / aeolian	-19.3974	-5.59586	0.138934	-9.05382	0.131892
CHA17-C24000	MS	alluvial / aeolian	-19.5634	-5.00459	0.0858403	-9.30998	0.147278
CHA17-C24200	MS	alluvial / aeolian	-19.79	-5.20161	0.125132	-8.93265	0.103934
CHA18-C24300	MS	alluvial / aeolian	-20.3799	-4.35645	0.486444	-8.31624	0.0513572
CHA17-C25400	MS	alluvial / aeolian	-20.9575	-4.93389	0.419844	-9.46142	0.20043
CHA18-C25000	MS	alluvial / aeolian	-21.0015	-5.29819	0.0598496	-8.77358	0.35661
CHA17-C25900	MS	alluvial / aeolian	-21.7969	-5.96909	0.34845	-9.72946	0.237447
CHA17-C26400	MS	alluvial / aeolian	-22.2424	-6.36491	0.314303	-9.32107	0.0777113
CHA17-C27000	MS	alluvial / aeolian	-22.5097	-5.93693	0.152366	-9.25822	0.162042
CHA17-C27200	MS	alluvial / aeolian	-22.6894	-6.31262	0.302468	-9.46784	0.161335
CHA18-C27150	MS	alluvial / aeolian	-22.9139	-6.1955	0.208771	-9.37515	0.122833
CHA18-C27600	MS	alluvial / aeolian	-23.3182	-5.30459	0.467939	-8.92012	0.259415
CHA17-C28400	MS	alluvial / aeolian	-23.9004	-5.6914	0.146345	-9.32456	0.153889
CHA17-C28600	MS	alluvial / aeolian	-24.0346	-5.45954	0.275158	-9.00897	0.0712364
CHA17-C28900	MS	alluvial / aeolian	-24.3925	-5.31687	0.186158	-9.03375	0.103782
CHA18-C29000	MS	alluvial / aeolian	-24.5674	-5.67501	0.105022	-9.2466	0.245477
CHA17-C29200	MS	alluvial / aeolian	-24.6532	-5.24032	0.961035	-8.94684	0.504961
CHA17-C29400	MS	alluvial / aeolian	-24.8678	-5.50861	0.487636	-9.00241	0.188432
CHA17-C30300	MS	alluvial / aeolian	-25.7385	-5.83639	0.140182	-9.7829	0.0325961
CHA17-C30500	MS	alluvial / aeolian	-25.9171	-5.56499	0.155747	-9.67313	0.163873
CHA17-C30800	MS	alluvial / aeolian	-26.2296	-5.93105	0.0910254	-9.83918	0.164281
CHA17-C31000	MS	alluvial / aeolian	-26.4082	-5.58991	0.0966899	-9.88337	0.0888929
CHA17-C31300	MS	alluvial / aeolian	-26.7217	-4.96926	0.154402	-9.56782	0.0940099
CHA17-C31500	MS	alluvial / aeolian	-26.9008	-5.75798	0.0758222	-9.81851	0.270215
CHA17-C32600	MS	alluvial / aeolian	-27.9712	-6.57732	0.251216	-10.2898	0.232485
CHA18-C34000	MS	alluvial / aeolian	-28.7715	-5.96242	0.0772435	-9.07942	0.11377
CHA18-C34210	MS	alluvial / aeolian	-28.8571	-5.92186	0.142776	-8.60945	0.367018
CHA17-C33600	MS	alluvial / aeolian	-28.979	-4.51607	0.674207	-9.44877	0.428675
CHA17-C34000	MS	alluvial / aeolian	-29.42	-5.43423	0.220595	-9.06127	0.217868
CHA18-C35220	MS	alluvial / aeolian	-30.3797	-5.67227	0.222282	-8.62188	0.0226673
CHA18-C35570	MS	alluvial / aeolian	-30.8972	-5.95963	0.318548	-8.42947	0.131803
CHA18-C35770	MS	alluvial / aeolian	-31.193	-6.16901	0.425582	-8.60766	0.12426
CHA17-C36300	MS	alluvial / aeolian	-31.6377	-6.58308	0.142826	-8.78765	0.189678
CHA18-C36170	MS	alluvial / aeolian	-31.786	-6.43772	0.17791	-8.55534	0.120232
CHA18-C36470	MS	alluvial / aeolian	-32.231	-5.46782	0.0467048	-9.33927	0.15515
CHA17-C37000	MS	alluvial / aeolian	-32.3052	-5.59537	0.232579	-9.62882	0.190798
CHA18-C37000	MS	alluvial / aeolian	-32.9885	-5.62484	0.267567	-9.76427	0.411084
CHA18-C37200	MS	alluvial / aeolian	-33.1855	-5.53858	0.0852481	-9.28905	0.114602
CHA18-C37400	MS	alluvial / aeolian	-33.3825	-5.54051	0.180254	-9.59895	0.599007
CHA18-LS-C13400	LS	distal alluvial	-38.79	-5.57331	0.105304	-8.71443	0.209987
CHA18-LS-C11250	LS	distal alluvial	-39.4287	-5.7519	0.405445	-8.88638	0.507849
CHA18-LS-C09950	LS	distal alluvial	-40.7278	-5.99823	0.210819	-8.62598	0.150191
CHA18-LS-C08800	LS	distal alluvial	-41.8271	-5.68993	0.36712	-9.03468	0.112677
CHA18-LS-C07900	LS	distal alluvial	-42.676	-6.53462	0.118122	-8.83022	0.082938
LS-CHA17-C07100	LS	distal alluvial	-43.5887	-6.42126	0.184243	-8.79256	0.248972
