# Supplementary material for: Central Asian Modulation of Northern Hemisphere Moisture Transfer Over the Late Cenozoic
Source: Research Square preprint supplement (doi:10.21203/rs.3.rs-117347/v1), 2020-12-11
Supplement: Supplementary file 3 [file 9236dd9cf79f82545ac63863.xlsx]

## Sheet: Sheet1
Sample ID	Primary Standard	grain	207Pba (cps)	Ub (ppm)	Pbb (ppm)	Thb/ U	238Uc / 206Pb	±2s (%)	207Pbc/206Pb	±2s (%)
CHA18-LS-C07900		184_U	28845.1	0.988596	0.247223	0.0612326	6.62823	1.32338	0.828897	0.52511
D = -42,68		185_U	34737.4	1.58539	0.293871	0.0842546	8.96128	3.11787	0.832943	0.491731
		186_U	40774.1	1.28619	0.343744	0.175128	6.21184	1.70163	0.831898	0.48253
		187_U	32615	1.08202	0.269868	0.153878	6.65184	4.05344	0.830612	0.557776
		188_U	27422.1	1.10753	0.22468	0.0579211	8.18496	1.57656	0.832231	0.607503
		189_U	96127.8	2.24505	0.839655	0.489682	4.44185	6.69744	0.833161	0.373788
		190_U	42733.4	2.48763	0.350111	0.0707469	11.7523	2.46667	0.824838	0.468252
		191_U	35757	1.42178	0.185701	0.143105	12.6773	5.11205	0.826869	0.563551
		191_Ui	88161.1	1.33237	1.03833	0.202298	2.1318	7.06234	0.833234	0.347234
		192_U	18384.7	1.55922	0.161343	0.047669	15.9782	1.35509	0.824075	0.565564
		193_U	22851	1.22528	0.1905	0.0588811	10.6541	1.58546	0.827611	0.535312
		194_U	18857.4	1.35013	0.165276	0.0343117	13.5174	1.96237	0.825659	0.611731
		195_U	26403.5	1.2211	0.191519	0.0750097	10.5567	3.71616	0.826782	0.535331
		196_U	75886	1.51337	0.619205	0.417361	4.05632	2.35815	0.831329	0.422473
		197_U	91528.8	1.80683	0.671025	0.330846	4.4721	7.63981	0.832699	0.389312
		198_U	92609.3	1.54758	0.693831	0.536649	3.69795	6.72295	0.829305	0.452744
		199_U	29276.3	1.28156	0.230853	0.244159	9.20237	4.54847	0.829022	0.51051
		212_U	86825.3	1.66433	0.740201	0.358587	3.72974	3.81626	0.830307	0.389517
		213_U	28781.2	1.29636	0.243098	0.234635	8.84828	1.438	0.830859	0.63045
		214_U	86230.1	1.60785	0.72512	0.437326	3.6813	7.06272	0.831956	0.366407
		215_U	53447.4	1.60222	0.450109	0.244759	5.90256	4.18483	0.829627	0.46543
		216_U	131053	2.23054	1.20977	3.92681	2.9626	7.85192	0.770538	0.516323
		217_U	29108.9	1.51717	0.246501	0.15794	10.1902	1.79841	0.826706	0.6307
		218_U	44410.8	1.76601	0.379278	0.177057	7.72702	2.93664	0.831134	0.455993
		219_U	147407	2.82332	1.27595	3.54754	3.5795	4.07149	0.78305	0.358871
		220_U	74337.6	1.93016	0.460681	0.308342	6.95409	3.78628	0.831435	0.467343
		221_U	70573.3	1.75062	0.597131	0.224426	4.86727	1.11062	0.831951	0.451468
		222_U	46680.6	1.48864	0.394376	0.203198	6.25909	2.80043	0.829611	0.537457
		223_U	33469.5	1.64995	0.286351	0.144803	9.55249	2.73279	0.829235	0.582619
		224_U	24116.9	0.770392	0.199625	0.095033	6.41203	1.99334	0.833425	0.606551
		225_U	32186.1	1.45182	0.272381	0.183122	8.85523	3.61396	0.833272	0.505619
		226_U	353580	1.84253	1.47633	0.243042	2.0749	16.076	0.834592	0.252711
		227_U	55044.8	2.31614	0.466254	0.0364705	8.2537	2.71538	0.83346	0.46077
		228_U	27255.4	1.06799	0.217281	0.12429	8.14946	2.97701	0.829396	0.531096
		228_Ui	577811	1.33517	6.78997	0.371961	0.326927	4.46593	0.83467	0.255056
		229_U	36829.6	0.665717	0.314893	0.0459062	3.51126	5.22473	0.832709	0.495878
		230_U	32763.9	0.94859	0.271953	0.0569401	5.79258	6.9279	0.832496	0.573569
		231_U	23503.6	1.41639	0.196387	0.0407774	11.9486	1.22052	0.827929	0.547603
		232_U	39633.8	1.64991	0.330497	0.192943	8.27901	3.9097	0.829846	0.463385
		233_U	57810.5	1.46121	0.465738	0.241803	5.20364	9.46264	0.830076	0.413648
		234_U	27362.6	1.37391	0.226805	0.0881151	10.0385	1.4404	0.828447	0.515764
		235_U	73367.3	1.8373	0.619031	0.256522	4.92503	6.75222	0.830978	0.41176
		236_U	64789.7	1.72376	0.553769	0.584461	5.15641	2.79051	0.827715	0.433635
		237_U	29552.8	1.36735	0.251386	0.04649	9.00946	1.9366	0.827541	0.531437
		238_U	97262.9	0.937801	0.850001	0.512519	1.83372	7.33952	0.834052	0.397092
		239_U	83409.2	1.14823	0.696887	1.11481	2.73854	2.16777	0.834102	0.381311
		240_U	33694.8	2.02578	0.335966	3.8235	8.90867	4.53489	0.621762	1.35761
		241_U	40552.7	2.10106	0.385234	3.4395	8.19052	5.65463	0.649694	1.90615
		242_U	29427.8	0.98762	0.281965	3.8272	5.46106	7.31065	0.715689	0.998941
		243_U	50990.8	1.75732	0.466945	3.74576	5.8664	10.523	0.715297	1.34261
		244_U	53659.3	0.880088	0.484792	2.03256	2.9049	7.38333	0.76287	0.802189
		245_U	139395	0.894834	1.18978	0.00115616	1.25084	3.05357	0.835305	0.375002
		258_U	211981	1.3869	1.76437	0.892305	1.33108	1.25663	0.870081	0.30673
		259_U	216350	1.41571	1.78086	0.891257	1.34765	1.08833	0.872247	0.286054
		260_U	214035	1.41078	1.77227	0.890398	1.349	1.07129	0.871577	0.30783
		261_U	217772	1.42656	1.79733	0.893726	1.34547	1.06233	0.872145	0.323948
		262_U	215441	1.41341	1.77879	0.89045	1.34611	1.07347	0.870911	0.30077
		263_U	213527	1.40135	1.76945	0.891531	1.34325	1.06678	0.873221	0.269206
		264_U	223319	1.34675	1.6942	0.849623	1.34822	1.05567	0.873168	0.304489
CHA17-C17200		A08	53864.8	1.15824	0.591985	0.185569	3.253	3.00673	0.835	0.63
D = -13,05		A09	28585.8	0.841764	0.273166	0.0335134	5.121	2.36388	0.834	0.94
		A10	64019.8	0.97655	0.643029	0.354107	2.522	1.63811	0.8325	0.6
		A11	127701	0.987264	1.21307	1.00898	1.352	2.40622	0.8331	0.38
		A12	93152.9	0.945876	0.919601	0.580571	1.709	1.4304	0.8332	0.53
		A13	93159.5	0.806089	0.919611	2.57602	1.457	1.17525	0.8345	0.5
		A14	28225.4	1.34386	0.274917	0.00430431	8.116	0.818556	0.832	0.7
		A15	334982	1.51934	3.36262	3.8786	0.751	4.03983	0.834	0.37
		A16	33311.4	1.14609	0.328488	0.0387445	5.798	5.75446	0.8339	0.78
		A17	40766.8	0.966616	0.400025	0.111075	4.012	1.51037	0.8319	0.71
		A18	21405.3	0.970425	0.211883	0.0767182	7.602	2.06701	0.8315	0.85
		A19	15624.4	0.907394	0.153831	0.00152775	9.792	1.88793	0.8317	0.95
		A20	25052.4	1.0815	0.239491	0.00569984	7.497	4.85929	0.8319	0.72
		A21	20397.6	0.704708	0.200101	0.0107714	5.863	1.73786	0.8373	0.87
		A22	7203.9	0.930701	0.0645569	0.00519649	23.86	1.8049	0.8259	1.1
		A23	31122.2	0.755243	0.2953	0.128178	4.248	4.07989	0.8327	0.68
		A24	180416	0.82233	1.77707	2.16593	0.7699	2.66924	0.8361	0.39
		A25	22714.6	1.8446	0.225664	0.00390324	13.56	2.46593	0.83	0.79
		A26	13740.4	2.50806	0.133913	0.00215563	31.08	3.39855	0.8309	0.88
		A27	36893.8	1.96479	0.358829	0.000688751	9.106	1.17203	0.8351	0.65
		A28	49151.7	1.0828	0.446625	0.0045875	4.03	4.00639	0.8343	0.61
		A29	18868.8	0.488165	0.181604	0.00426077	4.468	4.24161	0.8341	0.74
		A30	57788.7	1.12909	0.570994	0.158428	3.282	5.05167	0.8317	0.69
		A31	128293	1.00676	1.25666	1.0244	1.334	1.8491	0.8373	0.43
		A32	25257.5	0.638894	0.270405	0.105082	3.932	2.56723	0.8367	0.83
		A39	37691	2.99242	0.365805	0.0327131	13.55	1.63843	0.8281	0.69
		A40	128844	1.26377	1.27569	1.18471	1.648	4.41235	0.8363	0.5
		A41	186740	1.02237	1.81748	1.33324	0.9361	3.83739	0.8364	0.42
		A42	114774	1.04335	1.11689	0.435584	1.555	4.4956	0.8373	0.4
		A43	60223.6	2.20622	0.594412	0.106009	6.168	1.57138	0.8337	0.55
		A44	83521.7	2.68051	0.808334	0.129283	5.516	3.73468	0.8355	0.55
		A45	30303	0.560869	0.296423	0.0355215	3.141	1.62221	0.8317	0.81
		A46	65666.3	0.62163	0.633426	0.574206	1.634	2.29865	0.8376	0.57
		A47	79765.6	1.11697	0.781111	0.0143567	2.375	1.18067	0.833	0.55
		A48	28341.7	0.602165	0.272331	0.0052895	3.675	2.34336	0.8339	0.69
		A49	23067.7	2.16745	0.225832	0.000465134	15.95	1.42151	0.8336	0.71
		A50	1.2599e+06	0.941438	12.5621	2.20969	0.1247	4.25135	0.836	0.26
		A51	51871.6	0.671168	0.50945	0.196168	2.188	1.20728	0.8327	0.72
		A52	73364.4	0.538756	0.673801	0.979441	1.33	1.80895	0.8351	0.52
		A53	29904.4	0.672501	0.290391	0.122382	3.852	4.32639	0.8357	0.75
		A54	118440	0.819685	1.02506	1.17476	1.331	4.20328	0.837	0.51
		A55	77621.1	2.68045	0.74001	0.227048	6.02	4.04052	0.8341	0.52
		A56	98191.8	0.813436	0.953206	1.24022	1.421	1.85689	0.8375	0.49
		A57	48910.7	0.787854	0.48139	0.591581	2.72	3.83367	0.8337	0.64
		A58	36617.5	0.401698	0.358443	0.00223646	1.863	2.15793	0.8344	0.65
		A59	12240	0.46181	0.121063	0.00441053	6.323	2.42441	0.829	0.96
		A60	11835.5	0.506814	0.118285	0.00143505	7.115	2.20505	0.8324	0.93
		A61	8613.54	1.34634	0.0841168	0.000830901	26.55	4.21294	0.8305	1.1
		A62	81032.8	3.00038	0.789578	0.203449	6.312	2.32804	0.833	0.52
		A63	93055.8	1.00078	0.905325	0.51945	1.842	1.49698	0.8393	0.49
		A64	34750.9	2.09626	0.335461	0.00659272	10.39	1.1837	0.8357	0.66
		A65	130895	0.82223	1.07898	0.11071	1.268	5.05253	0.8362	0.66
		A66	313241	0.978866	3.02039	8.37861	0.54	4.09118	0.8388	0.39
		A73	9508.56	0.319425	0.0933179	0.00456628	5.698	1.56536	0.8372	0.98
		A74	159151	0.900291	1.53151	0.896697	0.9787	4.32349	0.8373	0.43
		A75	289626	1.17768	2.79703	2.8292	0.6996	1.6137	0.8334	0.35
		A76	6615.83	0.327178	0.0644713	0.00904377	8.444	3.51241	0.8361	1.4
		A77	11513.1	0.456856	0.0938653	0.0368113	8.067	2.84633	0.8288	1.9
		A78	110315	1.13646	1.08097	0.327324	1.744	3.56148	0.8306	0.46
		A79	67698.3	0.855315	0.619558	0.022241	2.294	3.75623	0.8339	0.58
		A80	67099.9	0.922429	0.608512	0.0168099	2.528	2.94931	0.8407	0.54
		A81	75385	0.725156	0.707409	1.06722	1.707	2.2619	0.8372	0.6
		A82	19929.6	0.366006	0.181147	0.00120911	3.358	3.19483	0.8339	1.1
		A83	113437	0.801821	1.08874	0.952144	1.223	2.78255	0.8331	0.5
		A84	282141	0.589781	2.72641	3.6895	0.36	3.23067	0.8364	0.38
		A85	310834	0.859128	3.109	5.43953	0.4592	2.96968	0.8338	0.38
		A86	27366.2	0.709581	0.260408	0.0792983	4.525	2.47412	0.8324	0.84
		A87	8755.89	0.421602	0.0818129	0.00175068	8.559	4.06702	0.8328	1.3
		A88	5242.59	0.216571	0.0498998	0.00141498	7.215	3.82272	0.8344	1.4
		A89	34707.4	2.24503	0.296543	0.00609229	12.57	1.40967	0.8319	0.83
		A90	158094	0.859017	1.48025	3.08782	0.9651	2.19297	0.8353	0.42
		A91	48913.9	3.81272	0.393429	0.0341854	16.04	3.3938	0.8259	0.64
		A92	271602	0.639458	2.55518	4.75518	0.4157	1.66522	0.8329	0.37
		A93	410468	1.16106	3.85594	5.76702	0.4998	3.27005	0.8314	0.36
		A94	539034	0.967779	4.89267	0.61766	0.329	7.73465	0.8354	0.33
		A95	76379.3	2.88822	0.718633	0.149653	6.664	0.99975	0.8296	0.62
		A96	68350.3	2.90317	0.647883	0.132362	7.435	3.32728	0.8309	0.6
		A97	162497	1.26963	1.52863	0.798136	1.382	5.90497	0.8367	0.45
		A98	126719	2.20341	1.19509	0.256314	3.063	2.9145	0.8332	0.43
		A99	128349	1.15043	1.20515	0.533317	1.587	1.38093	0.8349	0.47
		A100	49240	2.28329	0.440574	0.000720198	8.609	1.12164	0.8332	0.56
		A101	13708.7	2.21443	0.124905	0.00634538	29.31	3.05183	0.8239	1.1
		A108	188089	0.953626	1.62515	0.660377	0.9755	6.40558	0.8345	0.37
		A109	166530	3.545	1.53516	0.412479	3.826	2.13955	0.8281	0.35
		A110	72954.1	3.55486	0.700505	0.13734	8.42	1.83842	0.8307	0.59
		A111	73340.9	2.28609	0.68516	0.63594	5.537	1.29587	0.8311	0.69
		A112	104426	0.862799	0.972533	0.671139	1.472	1.89259	0.8305	0.46
		A113	132854	0.976703	1.12492	0.878266	1.442	6.98048	0.833	0.51
		A114	78807.4	0.759118	0.737332	0.54552	1.713	1.57229	0.8364	0.52
		A115	265831	0.841802	2.48412	2.42128	0.5638	1.50596	0.8359	0.38
CHA18-US2-C05675		114_U	128845	2.58286	1.03198	0.00123153	4.16811	2.87002	0.837883	0.307318
D = 28,78		115_U	125117	2.86941	1.00046	5.50847e-05	4.78166	1.82849	0.839977	0.312776
		116_U	53086.4	1.84092	0.397371	0.00233286	7.72672	5.6418	0.840731	0.400534
		117_U	56523.4	1.366	0.437537	0.00413416	5.20445	1.57978	0.839772	0.365152
		118_U	46364.6	1.88877	0.373522	0.00149769	8.41732	1.78056	0.837002	0.418473
		118_Ui	50937.1	1.96093	0.428668	0.000619845	7.62404	3.22198	0.839358	0.365704
		119_U	16663.5	0.818513	0.117101	0.000393764	11.6448	2.9918	0.838569	0.503779
		132_U	39814.1	1.76697	0.327568	0.00252962	8.98401	3.44893	0.838029	0.450838
		133_U	20853.8	0.457426	0.172961	0.00289103	4.41113	3.951	0.840828	0.513993
		134_U	79267.4	1.77809	0.645042	0.000966455	4.59296	1.50735	0.838839	0.329768
		135_U	79129.8	2.37913	0.650063	0.00342097	6.10098	4.26207	0.839762	0.3249
		136_U	150022	1.65767	1.23676	0.00249993	2.2341	2.49173	0.839553	0.2597
		137_U	190235	3.1588	1.6279	0.0180563	3.23229	2.70579	0.838354	0.277084
		138_U	122181	3.07016	0.971894	0.00106332	5.25847	3.56833	0.83703	0.287091
		139_U	88919.4	2.038	0.742547	0.00200935	4.58075	2.81681	0.842061	0.300336
		140_U	52884.7	2.03238	0.388698	0.00204634	8.71311	2.67354	0.839077	0.3984
		141_U	53172.9	2.01605	0.453531	-0.000161421	7.40991	2.95451	0.839682	0.387093
		142_U	115127	2.22808	1.39744	0.00262434	2.65706	3.73485	0.839169	0.344003
		142_Ui	117833	3.0925	0.958209	0.00141361	5.37596	3.01302	0.838309	0.32734
		143_U	153386	3.60677	1.18557	0.000407918	5.07262	3.99139	0.840228	0.265665
		144_U	103588	2.10218	0.866711	0.000557561	4.04374	2.1268	0.839993	0.292589
		145_U	120715	1.80818	0.97145	0.00236413	3.10207	1.86604	0.839297	0.277296
		146_U	63405.1	4.00745	0.521623	0.000542509	12.7991	3.26901	0.83857	0.363985
		147_U	63674.3	3.61403	0.520329	0.000204342	11.5675	4.21381	0.837953	0.36865
		148_U	105633	4.25545	0.885483	0.000536957	8.00453	1.1775	0.83815	0.316515
		149_U	60565.3	1.27722	0.500567	0.00161622	4.25701	4.20659	0.84137	0.348609
		150_U	133977	3.14277	1.11061	0.00149734	4.71797	1.08149	0.840065	0.281793
		151_U	109131	2.81856	0.906503	0.00235884	5.182	1.67524	0.839331	0.295802
		152_U	112830	2.77141	0.931269	0.00977071	4.95949	2.41191	0.839208	0.31652
		153_U	117493	3.34354	1.00099	0.0102248	5.56725	3.84013	0.839434	0.28525
		154_U	109844	2.84507	0.911382	0.0012241	5.20351	1.72765	0.839614	0.305664
		155_U	141935	2.79766	1.18741	0.00730737	3.92407	1.78733	0.838028	0.275623
		156_U	113060	2.67159	0.93065	0.00197369	4.78176	2.02699	0.838294	0.2988
		157_U	121184	3.58457	0.999159	0.000854217	5.97834	2.4611	0.839064	0.293372
		158_U	106465	2.45345	0.896195	0.00685271	4.56062	3.41061	0.838494	0.313507
		159_U	134037	3.15051	1.12586	0.000743008	4.66013	1.32073	0.837847	0.278153
		172_U	147924	4.19646	1.23599	-0.000224846	5.65639	2.11222	0.838594	0.274403
		173_U	68046.1	1.56081	0.572656	0.000874446	4.54455	3.81577	0.84019	0.359575
		174_U	82498.6	2.36408	0.683613	0.00245381	5.76443	2.36966	0.839615	0.317128
		175_U	21965	0.496195	0.155661	0.00530177	5.31127	4.88581	0.838826	0.50644
		176_U	34711.5	1.74514	0.305158	0.00149262	9.57654	6.38889	0.848471	0.435175
		177_U	54944.8	1.66967	0.598539	0.00326871	4.64666	2.90131	0.838289	0.37651
		177_Ui	52261.5	1.99438	0.419643	0.00202904	7.92071	2.096	0.839314	0.376847
		178_U	67214	2.0567	0.552192	0.00157229	6.20501	4.55911	0.838552	0.357778
		179_U	117601	2.20503	1.00108	0.0003817	3.6695	1.76679	0.838542	0.302061
		180_U	77068.7	2.79876	0.63259	-0.000312138	7.36697	1.20815	0.837595	0.300008
		180_Ui	71826.1	2.65343	0.583878	-0.000466653	7.57476	1.26543	0.839525	0.354997
		181_U	86821.2	1.42176	1.3196	0.00356957	1.7959	6.53301	0.839591	0.339532
		181_Ui	71783	1.80233	0.41545	0.00177242	7.22266	3.84188	0.837308	0.354609
		182_U	107294	2.25631	0.905754	0.00205655	4.1466	2.42675	0.836973	0.351219
		183_U	124268	2.9066	1.02019	0.00207303	4.74551	1.47129	0.838191	0.294707
CHA18-US2-C03075		013_U	44491.3	0.810276	0.334763	0.00533361	4.03174	2.5692	0.838266	0.56767
D = 31,376		014_U	114849	1.14261	0.888547	0.00220826	2.14297	1.66747	0.83916	0.410224
		015_U	30333.8	0.804342	0.235003	0.00346309	5.69796	4.33115	0.837188	0.582708
		016_U	60633.5	1.03344	0.483527	0.00264548	3.56079	4.21709	0.83863	0.552491
		017_U	66820.8	2.51191	0.519473	0.00037015	8.05278	1.15256	0.837861	0.491389
		018_U	81573	0.652772	0.625629	0.233912	1.73873	6.19125	0.8391	0.424118
		019_U	750792	1.18373	7.3495	1.93759	0.268292	5.66984	0.83833	0.315535
		020_U	148086	0.659478	1.14351	0.0742969	0.962238	1.40363	0.841462	0.368299
		021_U	67087.1	0.846006	0.527992	0.00294602	2.66667	4.46797	0.836614	0.500296
		022_U	440764	0.978273	3.39598	3.54336	0.480301	7.1217	0.84012	0.361818
		023_U	25275.2	0.50738	0.197276	0.0103743	4.28406	2.26601	0.838265	0.66394
		024_U	29260.9	1.22538	0.160286	0.0155099	12.7485	1.938	0.84042	0.609033
		025_U	15575.3	0.478283	0.118313	0.00876577	6.74233	1.96843	0.840743	0.77155
		026_U	40112.2	1.14924	0.318036	0.0015432	6.01016	3.13986	0.835412	0.545799
		027_U	76214.5	1.93525	0.600073	0.000352983	5.36893	2.42881	0.837197	0.447484
		028_U	106543	2.01213	0.832343	0.0017444	4.02807	1.63017	0.838911	0.402155
		029_U	48248.4	1.48061	0.378419	-0.000829317	6.51232	1.43555	0.836809	0.499377
		030_U	79414.6	1.7456	0.628506	-0.000558913	4.61988	1.97654	0.835605	0.426518
		031_U	52272.7	1.3801	0.411405	0.00113735	5.57937	1.51976	0.835389	0.458229
		032_U	74605.9	1.81652	0.587036	0.000566821	5.15547	1.97418	0.838687	0.479386
		033_U	37107.7	0.737077	0.285371	0.0051683	4.30932	3.69967	0.841392	0.625174
		034_U	46234	1.23251	0.361992	-0.000300148	5.67978	1.18494	0.841106	0.484419
		035_U	29808.7	1.83258	0.238251	0.00120784	12.7939	6.6473	0.835522	0.687749
		036_U	73437.1	0.579789	0.563967	0.122722	1.71642	14.1957	0.842721	0.527745
		037_U	15642.1	0.647424	0.123147	0.00159509	8.75331	1.63151	0.837428	0.775635
		038_U	40870.3	1.98712	0.319943	0.000274589	10.3384	2.12619	0.836966	0.564699
		039_U	57981.7	2.554	0.455422	0.00011778	9.34199	2.79955	0.83842	0.494758
		052_U	22352.4	0.855779	0.141487	0.00904874	10.0571	3.99203	0.834874	0.705883
		053_U	413817	1.06607	2.64426	2.59182	0.671032	2.84666	0.836775	0.329247
		054_U	58654.8	2.08041	0.465503	0.00125107	7.43419	1.99924	0.835661	0.509113
		055_U	169464	3.22899	1.33077	0.0062613	4.03565	3.38101	0.835409	0.375553
		056_U	162882	3.14287	1.24587	0.00255267	4.195	5.61859	0.835091	0.385169
		057_U	56268.5	4.40648	0.44445	0.0180185	16.5068	2.59373	0.83737	0.522682
		058_U	55187.8	3.87222	0.440747	0.00104559	14.6284	1.14662	0.837505	0.499704
		059_U	175109	3.75079	1.39314	0.0659148	4.48386	3.13431	0.837945	0.372296
		060_U	153320	3.66262	1.21267	0.168195	5.01883	3.22172	0.83366	0.383107
		061_U	499628	3.28857	3.89878	1.17233	1.40543	4.4069	0.838845	0.324591
		062_U	10647.3	0.493687	0.0908658	0.00175721	9.04322	1.99603	0.836828	0.831036
		063_U	21909.4	0.444213	0.164839	0.0241491	4.4812	3.96241	0.83503	0.689648
		064_U	258125	0.74819	2.24844	0.318224	0.555341	6.87918	0.84194	0.344072
		065_U	90755.6	2.31699	0.706644	0.00258496	5.46363	3.1426	0.838975	0.435299
		066_U	89382	2.13217	0.706735	0.00245587	5.01879	2.73865	0.835783	0.456394
		067_U	48328.7	1.5523	0.385634	0.0016751	6.71374	5.08516	0.840772	0.59979
		068_U	170212	3.99184	1.30341	0.0321328	5.09876	3.23481	0.837267	0.405815
		069_U	148255	4.26393	1.19817	0.0543706	5.91463	5.40815	0.83403	0.415498
		070_U	142046	4.1154	1.11582	0.00447665	6.13862	1.56132	0.83674	0.380452
		071_U	187378	3.34561	1.51311	0.000330124	3.68177	1.90004	0.837623	0.373227
		072_U	222766	5.39465	1.76089	0.00471095	5.10241	2.14888	0.838029	0.356955
		073_U	140280	2.70111	1.12805	0.00270494	3.98392	3.81038	0.836054	0.390844
		074_U	110715	2.12114	0.879688	0.0203662	4.01549	2.37019	0.837825	0.407488
		075_U	84238.2	2.20013	0.682101	0.00260442	5.36412	2.75344	0.835189	0.444631
		076_U	55013.7	1.79031	0.438072	0.00196932	6.8118	1.30393	0.839506	0.503391
		077_U	100411	2.60449	0.791554	0.00186347	5.47859	2.31495	0.837511	0.413824
		078_U	69091.8	1.45807	0.533711	0.00311433	4.54632	2.82744	0.836456	0.576671
		079_U	200943	4.42872	1.6566	0.000233166	4.44565	2.61254	0.835081	0.371273
		092_U	258890	4.45402	2.12379	0.000361806	3.48795	3.47643	0.835323	0.336709
		093_U	254494	3.56094	2.06305	-0.000191918	2.87155	1.92882	0.835902	0.340917
		094_U	247227	4.16083	2.01444	0.00208242	3.43717	6.97127	0.836408	0.379561
		095_U	79475.6	4.43636	0.601141	0.00151033	12.2789	1.84438	0.836103	0.523577
		096_U	69695.2	4.67194	0.55428	0.000553797	14.0297	4.92032	0.836866	0.516669
		097_U	143958	3.10925	1.1786	0.0118492	4.38926	1.28457	0.836087	0.387928
		098_U	169266	2.38557	1.37726	0.0135659	2.88157	1.93889	0.835868	0.382028
		099_U	204387	2.51939	1.59295	0.0330733	2.63251	3.91755	0.83685	0.365735
		100_U	193749	2.57482	1.60699	0.037053	2.66654	2.35884	0.836576	0.370839
		101_U	12486.1	0.98086	0.0847225	0.00404935	19.2305	2.6124	0.832918	0.435397
		102_U	71354.6	2.53353	0.568448	0.00250322	7.41681	3.62153	0.836431	0.493381
		103_U	72339.8	4.65192	0.596486	0.0016462	12.9804	3.01205	0.836766	0.466523
		104_U	44612.4	4.31265	0.37026	0.000694632	19.3887	3.09981	0.836998	0.560092
		105_U	60481.8	3.30965	0.49302	0.000772746	11.1944	3.99307	0.840417	0.542272
		106_U	52268.1	2.82496	0.428367	0.00193301	10.9757	2.54165	0.836669	0.500723
		107_U	72659.5	4.91646	0.591839	0.000474157	13.8291	1.52316	0.837152	0.462449
		108_U	85062.1	3.07174	0.697607	0.00152519	7.33484	4.5886	0.838352	0.48383
		109_U	53247.1	3.05133	0.409826	0.00125706	12.4106	7.63167	0.839608	0.521797
		110_U	42327.1	5.01093	0.350059	0.000379145	23.7811	3.25071	0.833238	0.506061
		111_U	61599.1	3.56224	0.491553	0.00162996	12.0932	1.99271	0.841756	0.464428
		112_U	38365.4	4.68054	0.325366	0.00164334	23.9331	2.50889	0.835964	0.512832
		113_U	26748.2	2.69298	0.217563	0.000369288	20.5764	3.05935	0.834401	0.64826
RM0	NIST614	N01	103852	0.822193	2.67416	0.850537	0.8084	0.660689	0.8717	2.47173
	NIST614	N02	118322	0.918189	3.00737	0.857335	0.8072	0.635661	0.8704	2.46767
	NIST614	N33	118043	0.931541	2.95221	0.852997	0.811	0.594433	0.8712	2.40945
	NIST614	N34	116958	0.922334	2.91661	0.848155	0.8047	0.615498	0.8692	2.41719
	NIST614	N67	120454	0.882813	2.88961	0.856869	0.8061	0.72364	0.8716	2.45868
	NIST614	N68	118473	0.898626	2.89958	0.868129	0.8095	0.740096	0.8702	2.45467
	NIST614	N102	119076	0.884494	2.83673	0.864814	0.8077	0.732847	0.871	2.43815
	NIST614	N103	119924	0.883738	2.83925	0.869799	0.8078	0.705437	0.8728	2.42595
	NIST612	001_A	360085	36.3361	19.7083	0.967864	3.494	0.221127	0.9075	0.0870494
	NIST612	002_A	365422	36.7647	20.0931	0.967312	3.471	0.241972	0.9096	0.125508
	NIST612	040_A	362863	37.684	20.4742	0.984167	3.487	0.190352	0.9067	0.140018
	NIST612	041_A	363356	37.6979	20.5243	0.980192	3.481	0.194836	0.9074	0.15504
	NIST612	080_A	357799	38.1305	20.7293	0.983879	3.483	0.153198	0.906	0.120967
	NIST612	081_A	357436	37.9656	20.6533	0.985299	3.482	0.195036	0.9064	0.10423
	NIST612	120_A	353764	38.497	20.8959	0.987429	3.49	0.251558	0.9066	0.146604
	NIST612	121_A	354478	38.6193	21.0357	0.986248	3.477	0.16436	0.9061	0.125414
	NIST612	160_A	343549	38.1221	20.6923	0.988429	3.492	0.157545	0.9079	0.143097
	NIST612	161_A	344954	38.2749	20.7836	0.988014	3.489	0.218497	0.9069	0.116941
	NIST612	200_A	337194	37.0461	20.1336	0.988233	3.489	0.164843	0.9085	0.127607
	NIST612	201_A	330924	36.3988	19.8637	0.986369	3.473	0.210757	0.9075	0.151873
	NIST612	246_A	327468	36.2164	19.7013	0.985846	3.483	0.1633	0.9072	0.133856
	NIST612	247_A	322766	35.5614	19.4116	0.985514	3.473	0.199792	0.9079	0.148838
RM1	WC1	C03	2446.42	3.27629	0.131739	4.60243e-05	0.04038	1.03323	0.05235	8.28331
	WC1	C04	3103.41	4.26047	0.172411	0.000161044	0.04054	0.886073	0.051	8.24739
	WC1	C35	3057.69	3.45368	0.140829	8.33417e-05	0.03964	1.07236	0.0512	8.2504
	WC1	C36	2787.56	3.94266	0.155591	0.000187975	0.04003	1.33966	0.04887	8.2622
	WC1	C69	3318.24	4.16044	0.169769	0.000153752	0.0405	0.9479	0.04961	8.2389
	WC1	C70	3184.86	3.48132	0.144702	0.00011701	0.04031	1.64774	0.05319	8.24511
	WC1	C104	3316.89	3.84113	0.155902	0.000116523	0.04004	1.11454	0.0507	7.28438
	WC1	C105	2749.98	3.48699	0.138623	7.24232e-05	0.04003	1.05527	0.0536	8.26467
	WC1	003_B	17185.3	12.6669	0.546767	0.000239003	22.42	1.05572	0.1177	3.18359
	WC1	004_B	10801.9	12.0373	0.477403	0.000227035	23.73	1.04033	0.08725	4.09511
	WC1	042_B	11721.1	10.996	0.44366	0.000309065	23.6	1.13533	0.09998	4.82495
	WC1	043_B	6791.25	9.33451	0.358096	<0.0001	24.19	1.13533	0.07228	1.65751
	WC1	082_B	14566	11.554	0.495314	<0.0001	22.67	1.11123	0.1223	3.26007
	WC1	083_B	20373.2	10.278	0.494406	0.000343869	21.03	1.503	0.1682	5.54645
	WC1	122_B	13061.1	9.60484	0.413004	0.000195639	22.7	1.11655	0.1272	1.7021
	WC1	123_B	10440.7	10.4188	0.429257	0.000366421	23.13	1.12582	0.1008	3.10552
	WC1	162_B	13545.9	12.9884	0.535509	0.000189942	23.21	1.06092	0.1053	1.29802
	WC1	163_B	16411.9	10.3673	0.472551	0.000433253	21.71	1.59249	0.1431	1.70339
	WC1	202_B	15766.5	11.8925	0.512863	0.000237656	22.69	1.46988	0.1299	1.53358
	WC1	203_B	10836.3	11.5188	0.463956	<0.0001	23.54	1.21908	0.09522	1.7301
	WC1	248_B	16082	11.9529	0.520399	0.000207746	22.43	1.40757	0.128	6.57914
	WC1	249_B	8912.75	7.41146	0.316806	0.000247712	22.58	1.37997	0.1147	2.24553
RM2	ASH-15D	Z05	643.197	2.31632	0.0110532	0	0.001346	4.1223	0.5707	4.85788
	ASH-15D	Z06	839.366	1.69421	0.0152237	0	0.002183	4.36454	0.6848	4.29251
	ASH-15D	Z37	1157.67	1.91308	0.0213268	-3.35357e-06	0.003595	4.21416	0.7333	3.51276
	ASH-15D	Z38	1763.19	1.218	0.0315497	-5.3832e-06	0.007975	5.25307	0.7952	3.08462
	ASH-15D	Z71	580.445	1.01317	0.00990492	0	0.002416	4.60609	0.6918	4.87273
	ASH-15D	Z72	729.628	4.01076	0.0167009	-1.5958e-06	0.00131	5.95366	0.5534	5.93316
	ASH-15D	Z106	925.648	4.36129	0.0191987	3.6439e-06	0.001632	5.56258	0.5939	5.7276
	ASH-15D	Z107	2473.99	3.57238	0.0460133	0	0.003627	4.69794	0.7377	3.77327
	ASH-15D	005_C	1973.4	3.91235	0.0149693	<0.0001	390.5	4.09991	0.7218	2.44951
	ASH-15D	005_Ci	1945.22	3.92506	0.0163204	<0.0001	361.5	5.11957	0.7323	2.3644
	ASH-15D	006_C	3170.33	9.15321	0.0258729	<0.0001	516.1	2.51194	0.6812	1.76828
	ASH-15D	044_C	13322.8	4.71998	0.0832485	0.000219884	90.41	10.9941	0.8371	0.867865
	ASH-15D	045_C	2542.29	3.80362	0.023291	0.000188147	251.7	6.29874	0.7748	2.12624
	ASH-15D	045_Ci	3629.49	2.74231	0.028725	<0.0001	149.6	5.32969	0.8051	2.19559
	ASH-15D	084_C	4419.39	1.54202	0.0291007	<0.0001	84.8	5.67619	0.8435	1.36181
	ASH-15D	085_C	3555.19	3.07655	0.0268052	<0.0001	180.1	3.56585	0.8078	1.78169
	ASH-15D	124_C	2298.58	1.9229	0.0176417	0.000362572	170.1	4.72383	0.7975	2.25007
	ASH-15D	125_C	5281.4	4.51618	0.0378729	0.000237225	186	7.32055	0.7973	1.68927
	ASH-15D	164_C	1786.49	3.96425	0.0175717	0.000583989	342.4	3.01066	0.7473	2.35609
	ASH-15D	164_Ci	3545.79	3.96366	0.029242	<0.0001	210.1	7.77652	0.7858	2.12501
	ASH-15D	165_C	3372.97	1.82031	0.027833	<0.0001	103.5	6.37417	0.8238	1.93602
	ASH-15D	204_C	325.951	2.0821	0.00323153	0.000494182	867.9	5.24951	0.5533	7.54265
	ASH-15D	204_Ci	569.239	2.04511	0.00445492	<0.0001	650.3	5.16576	0.6333	4.94104
	ASH-15D	205_C	2462.36	5.84797	0.0196376	<0.0001	441.6	5.472	0.7088	2.37241
	ASH-15D	250_C	675.695	6.85224	0.0077681	<0.0001	1114	10.2251	0.4565	8.49405
	ASH-15D	250_Ci	1089.54	6.66162	0.0104483	<0.0001	851	4.71654	0.5385	4.68671
	ASH-15D	251_C	1977.64	3.00662	0.0150195	0.000843882	305.5	9.36477	0.7583	2.54518
RM3	CalGr	007_D	30419.9	17.7652	0.279582	<0.0001	86.95	1.08968	0.5775	0.587039
	CalGr	008_D	1086.49	7.28157	0.0271471	<0.0001	268.7	1.65702	0.1567	3.63351
	CalGr	046_D	32421.9	20.316	0.308461	<0.0001	89.51	1.06629	0.5669	0.565476
	CalGr	047_D	818.963	7.67961	0.0260064	<0.0001	287	1.44329	0.1225	3.34207
	CalGr	086_D	28785.6	18.9492	0.281983	<0.0001	91.03	1.04515	0.5618	0.537062
	CalGr	087_D	748.046	7.10135	0.0242373	0.000102552	285	1.27631	0.1232	3.2148
	CalGr	126_D	29725.3	20.4051	0.299768	<0.0001	92.38	1.0539	0.5647	0.755482
	CalGr	127_D	4900.58	32.6262	0.124233	<0.0001	265.4	1.13716	0.1668	1.1819
	CalGr	166_D	30931.3	21.316	0.316363	<0.0001	91.4	1.06197	0.564	0.536637
	CalGr	167_D	976.978	10.3237	0.0343712	<0.0001	290.3	1.25914	0.1164	3.39768
	CalGr	206_D	28671.2	21.2241	0.294478	<0.0001	97.23	1.07659	0.5553	0.575269
	CalGr	207_D	1337.06	14.718	0.0486511	<0.0001	291.3	1.21223	0.1119	2.54908
	CalGr	252_D	36497.8	22.5009	0.364343	<0.0001	84.77	1.03303	0.5825	0.533957
	CalGr	252_Di	36196.3	22.0175	0.355641	0.000126682	85.02	1.07289	0.5833	0.57873
	CalGr	253_D	2122.03	21.409	0.0719238	<0.0001	288.9	1.13318	0.1209	2.19262
RM5	B6	011_F	3236.71	3.97795	0.0457166	0.000355148	99.98	4.99723	0.3255	8.00759
	B6	012_F	371644	2.80954	2.45871	0.0389295	1.833	6.96431	0.8479	0.393206
	B6	050_F	4303.41	4.15723	0.0541305	<0.0001	91.39	2.63672	0.3729	3.94032
	B6	051_F	4750.55	5.16818	0.0628886	0.000185072	95.68	4.4366	0.3433	4.36152
	B6	090_F	2512.24	6.16508	0.0522158	0.000676926	122.3	3.83514	0.1962	11.0978
	B6	091_F	4900.41	3.61808	0.0565332	<0.0001	79.27	3.44129	0.4286	5.19972
	B6	130_F	2484.55	15.3135	0.101428	<0.0001	143.4	1.17636	0.09692	6.13154
	B6	131_F	19710.1	9.23229	0.209421	0.000227057	59	4.86854	0.543	3.02279
	B6	131_Fi	37387.3	9.33358	0.333355	0.000232894	40.28	6.94667	0.6582	2.23562
	B6	170_F	6251.61	2.35866	0.063573	0.00106216	51.43	4.84472	0.5984	1.89802
	B6	171_F	9770.31	2.07252	0.0880515	<0.0001	34.4	7.05735	0.6846	1.93147
	B6	171_Fi	13371.4	0.809479	0.157767	<0.0001	8.086	27.6643	0.8163	2.09001
	B6	210_F	2821.96	25.4587	0.159996	0.00021616	147.2	1.15474	0.0688	3.66798
	B6	211_F	4636.94	0.131789	0.0317624	<0.0001	6.591	15.7003	0.83	2.23455
	B6	256_F	5379.41	19.2817	0.144775	0.00200745	133.4	1.42235	0.1563	4.63946
	B6	257_F	23757.1	3.49091	0.191469	-0.000134827	27.28	3.57107	0.724	1.2305
